# Supplementary material
Source: PubMed Central journal article supplement (PMC6329546)
Supplement: jcsm.15.1.79s1.pdf [file jcsm.15.1.79s1.pdf]

Figure S1

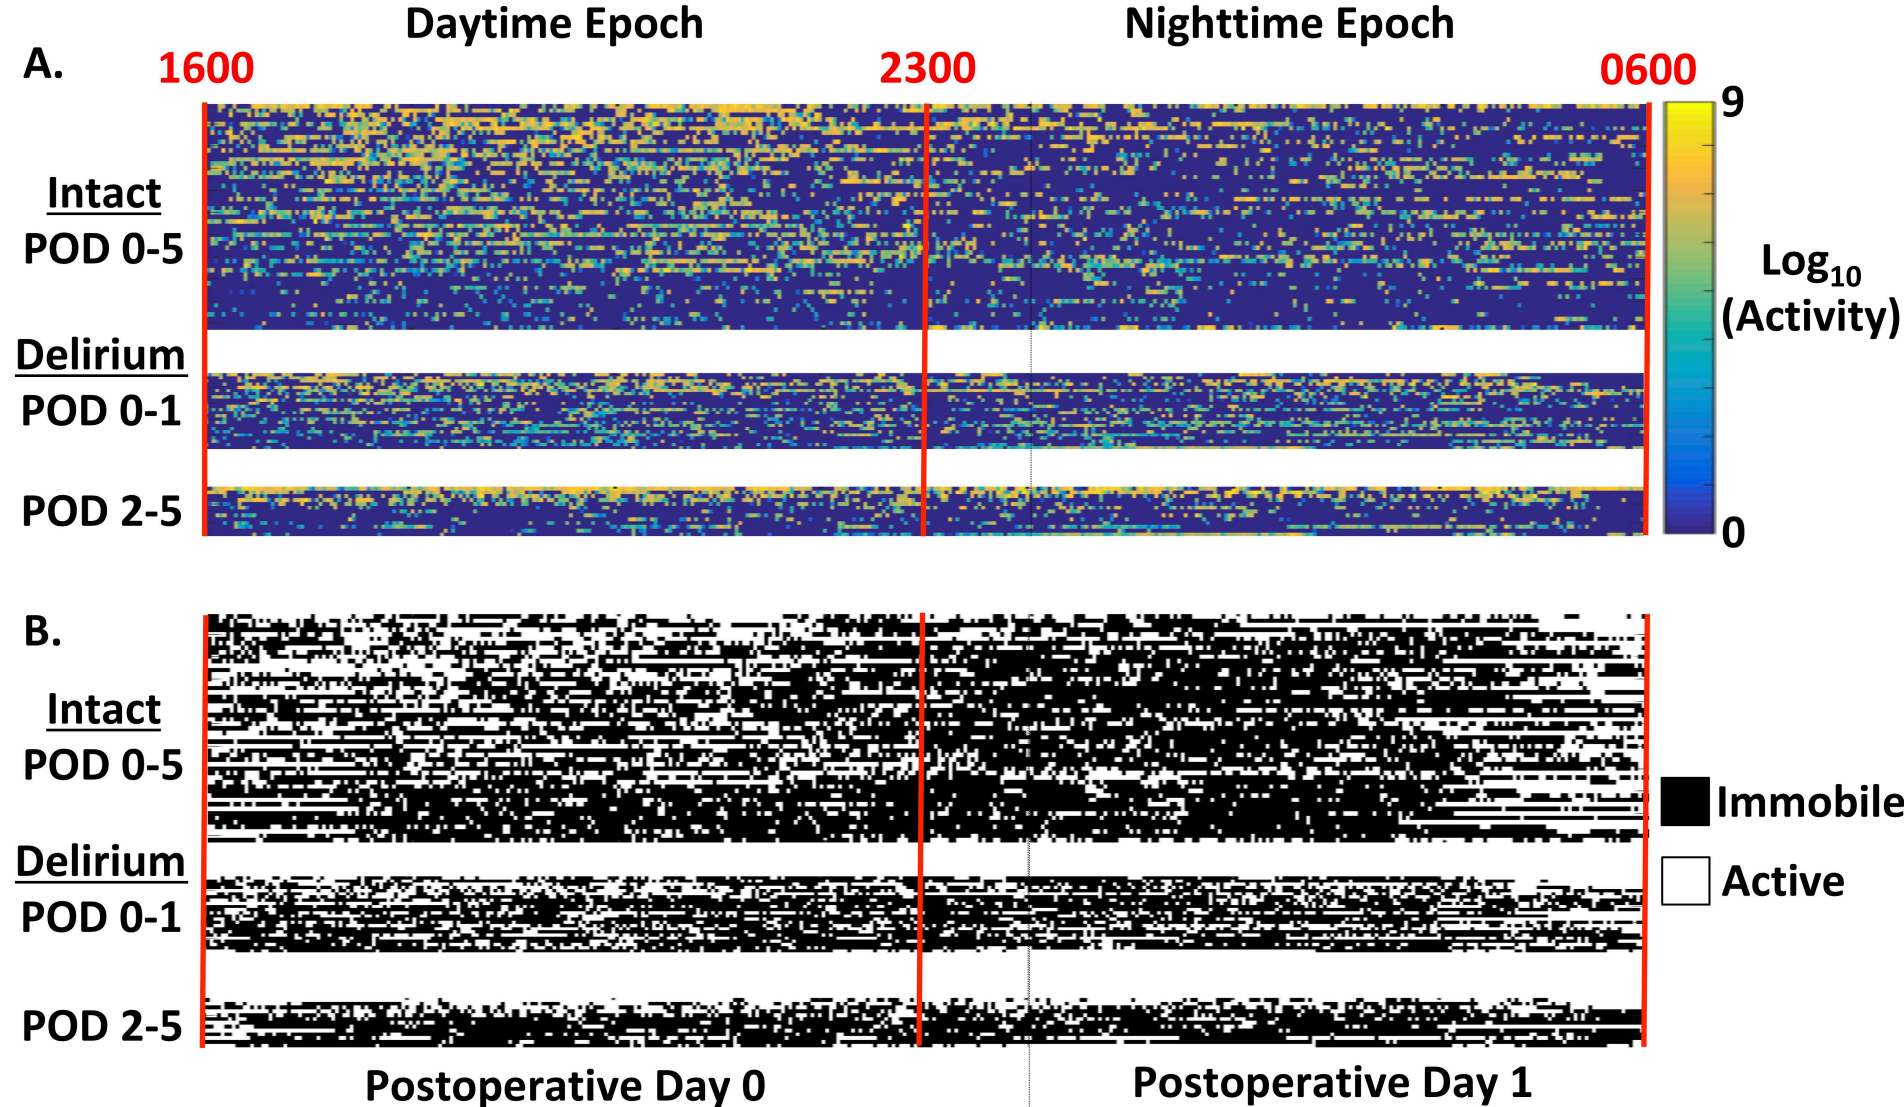

|                     | Median Activity Counts<br>(MAC) x 10 <sup>3</sup> , MAC <sub>Day-Night</sub> |                      | Number of Immobile Minutes (NOIM)<br>NOIM <sub>Night-Day</sub> |                     |
|---------------------|------------------------------------------------------------------------------|----------------------|----------------------------------------------------------------|---------------------|
|                     | Delirium<br>POD 0-1                                                          | Delirium<br>POD 2-5  | Delirium<br>POD 0-1                                            | Delirium<br>POD 2-5 |
| Intact<br>POD 0-5   | 0.66<br>[0.53 0.78]*                                                         | 0.71<br>[0.56 0.87]* | 0.62<br>[0.49 0.75]                                            | 0.57<br>[0.40 0.74] |
| Delirium<br>POD 0-1 |                                                                              | 0.58<br>[0.37 0.78]  |                                                                | 0.57<br>[0.35 0.78] |

**Table S1. Discriminability between groups based on Median Activity Counts (MAC) or Number of Immobile Minutes (NOIM).** C-statistic values are listed for discriminating paired groups with [95% CI]. Values only shown for LFE inactive. \*95% CI does not include 0.5.

|                                                 | Odds Ratio<br>(95% CI) | <i>P</i> |
|-------------------------------------------------|------------------------|----------|
| MAC <sub>Day</sub> – MAC <sub>Night</sub>       | 0.60 [0.35 1.1]        | 0.08     |
| MAC <sub>Day</sub> – MAC <sub>Night</sub> LFE   | 0.60 [0.35 1.1]        | 0.08     |
| MAC <sub>Day</sub>                              | 0.86 [0.50 1.5]        | 0.58     |
| MAC <sub>Day</sub> LFE                          | 0.87 [0.51 1.5]        | 0.60     |
| MAC <sub>Total</sub>                            | 1.03 [0.63 1.7]        | 0.91     |
| MAC <sub>Total</sub> LFE                        | 1.04 [0.63 1.7]        | 0.88     |
| MAC <sub>Night</sub>                            | 1.20 [0.75 1.9]        | 0.45     |
| MAC <sub>Night</sub> LFE                        | 1.22 [0.75 2.0]        | 0.42     |
| NOIM <sub>Night</sub> – NOIM <sub>Day</sub>     | 0.72 [0.43 1.2]        | 0.21     |
| NOIM <sub>Night</sub> – NOIM <sub>Day</sub> LFE | 0.68 [0.40 1.1]        | 0.15     |
| NOIM <sub>Night</sub>                           | 0.85 [0.52 1.4]        | 0.50     |
| NOIM <sub>Night</sub> LFE                       | 1.04 [0.63 1.7]        | 0.88     |
| NOIM <sub>Total</sub>                           | 0.99 [0.61 1.6]        | 0.98     |
| NOIM <sub>Total</sub> LFE                       | 0.98 [0.60 1.6]        | 0.95     |
| NOIM <sub>Day</sub> LFE                         | 1.18 [0.72 2.0]        | 0.51     |
| NOIM <sub>Day</sub>                             | 1.17 [0.71 1.9]        | 0.54     |

**Table S2.** Adjusted univariate classification ORs for one standard deviation change in the respective actigraphy variable for the presence of delirium at any point during the interval from POD 0-5. With adjustment for covariates, *P* > 0.05 for all measures, Likelihood ratio test.
